# Supplementary material for: Anthocyanins inhibit tumor necrosis alpha-induced loss of Caco-2 cell barrier integrity
Source: Royal Society of Chemistry journal article supplement (doi:10.1039/c7fo00625j), 2017-01-01
Supplement: c7fo00625j1.pdf [file c7fo00625j1.pdf]

**Supplemental Table 1.** Content of benzoic acids, hydroxycinnamates, flavonols and catechins in the studied ACRE.

|                 |                   | 1.Black chokeberry | 2.Black kernel rice | 3.Wild blueberry | 4.Bilberry | 5.Crowberry                           | 6.Blueberry | 7.Red grape |
|-----------------|-------------------|--------------------|---------------------|------------------|------------|---------------------------------------|-------------|-------------|
|                 |                   | <u>umol/g</u>      |                     |                  |            |                                       |             |             |
| Benzoic acids   | 3-methylgallate   | b/loq              | nd                  | b/loq            | 0.8        | nd                                    | b/loq       | b/loq       |
|                 | 4-hydroxybenz     | b/loq              | nd                  | nd               | nd         | nd                                    | 6.7         | nd          |
|                 | Ferulic acid      | b/loq              | nd                  | nd               | 0.8        | nd                                    | b/loq       | 0.23        |
|                 | Fumaric acid      | nd                 | nd                  | nd               | nd         | nd                                    | nd          | nd          |
|                 | Gallic acid       | b/loq              | nd                  | b/loq            | 9.8        | b/loq                                 | 8.5         | 2.6         |
|                 | Protocatechuic    | 5.2                | 83                  | b/loq            | 16         | 1.8                                   | 12          | nd          |
|                 | Quinic acid       | nd                 | nd                  | nd               | nd         | nd                                    | nd          | nd          |
|                 | Shikimic acid     | b/loq              | nd                  | nd               | b/loq      | nd                                    | b/loq       | nd          |
|                 | Syringic acid     | b/loq              | nd                  | nd               | nd         | nd                                    | nd          | b/loq       |
|                 | Vanillic acid     | nd                 | nd                  | nd               | nd         | nd                                    | nd          | b/loq       |
|                 | Hydroxycinnamates | Caffeic acid       | b/loq               | nd               | b/loq      | 35                                    | nd          | 105         |
| Chlorogenic aci |                   | 1472               | nd                  | b/loq            | 19         | 44                                    | nd          | nd          |
| pCoumaric       |                   | b/loq              | nd                  | nd               | 21         | 0.06                                  | 34          | b/loq       |
| Sinapinic acid  |                   | b/loq              | nd                  | nd               | b/loq      | nd                                    | 2.9         | nd          |
| Flavonols       | Kaempf-3-galac    | b/loq              | nd                  | nd               | 4.3        | nd                                    | nd          | b/loq       |
|                 | Kaempf-3-gluc     | b/loq              | 20                  | nd               | 2.9        | b/loq                                 | 1.0         | 1.5         |
|                 | Kaempferol        | nd                 | b/loq               | b/loq            | b/loq      | b/loq                                 | b/loq       | b/loq       |
|                 | Mry-3-gluc        | b/loq              | b/loq               | b/loq            | 0.08       | b/loq                                 | 0.05        | 0.08        |
|                 | Naringenin        | nd                 | nd                  | nd               | b/loq      | b/loq                                 | b/loq       | nd          |
|                 | Querc             | 0.28               | nd                  | 0.06             | 0.17       | 0.52                                  | 0.19        | 0.15        |
|                 | Querc-3-galac     | 27                 | 1.6                 | 1.71             | 5.2        | 13                                    | b/loq       | 4.7         |
|                 | Querc-3-Rutin     | 4.5                | b/loq               | 0.10             | 0.06       | b/loq                                 | 0.41        | nd          |
| Catechins       | Catechin          | nd                 | nd                  | b/loq            | 2.0        | 1.1                                   | nd          | 2.8         |
|                 | Epicatechin       | 3.1                | nd                  | b/loq            | 2.0        | 13                                    | b/loq       | 3.0         |
|                 | Gallocatechin     | b/loq              | nd                  | b/loq            | b/loq      | 0.49                                  | nd          | nd          |
| Other           | Ellagic acid      | *                  | nd                  | nd               | *          | nd                                    | *           | nd          |
|                 | Resveratrol       | *                  | nd                  | *                | *          | nd                                    | *           | *           |
|                 |                   |                    |                     |                  |            | * present, not quantified             |             |             |
|                 |                   |                    |                     |                  |            | nd = not detected                     |             |             |
|                 |                   |                    |                     |                  |            | b/loq = below limit of quantification |             |             |
